# Supplementary material for: Yield Trends Are Insufficient to Double Global Crop Production by 2050
Source: PLoS One. 2013 Jun 19;8(6):e66428. doi: 10.1371/journal.pone.0066428 (PMC3686737; doi:10.1371/journal.pone.0066428)
Supplement: Data S1 — Rates observed for each crop and country. (XLSX) [file pone.0066428.s017.xlsx]

## Sheet: MAIZE
	MAIZE	current rates
		mean	mean
		%/year	kg/ha/year/year
	Region
	GLOBAL	1.64	84
	ASIA-AUSTRALASIA
1	Afghanistan	1.08	21
2	Australia	1.41	82
3	Azerbaijan	4.23	213
4	Bangladesh	5.29	277
5	Bhutan	3.72	100
6	Cambodia	4.2	153
7	China	0.96	51
8	Dem. People's Republic of Korea (North Korea)	-8.14	-167
9	Georgia	-2.12	-42
10	India	1.63	34
11	Indonesia	2.37	84
12	Iran (Islamic Republic of)	3.29	294
13	Iraq	0.85	20
14	Kazakhstan	1.69	69
15	Kyrgyzstan	0.33	18
16	Lao People's Democratic Republic	3.58	142
17	Myanmar	2.9	83
18	Nepal	1.3	26
19	New Zealand	0.49	53
20	Pakistan	3.25	93
21	Philippines	2.64	62
22	Republic of Korea (South Korea)	0.17	7
23	Saudi Arabia	3.52	129
24	Syrian Arab Republic	1.21	51
25	Tajikistan	-0.77	-25
26	Thailand	2.1	90
27	Turkey	2.23	134
28	Uzbekistan	1.57	76
29	Vietnam	3.38	133
	EUROPE
30	Albania	1.86	85
31	Austria	1.31	138
32	Belarus	4.36	199
33	Belgium	2.22	281
34	Bulgaria	0.68	24
35	Czech Republic	2.99	235
36	France	1.17	109
37	Germany	1.03	93
38	Greece	0.21	22
39	Hungary	0.83	49
40	Italy	0.87	84
41	Moldova	-4.94	-99
42	Netherlands	2.06	241
43	Poland	1.14	68
44	Portugal	2.52	160
45	Romania	0.69	23
46	Russian Federation	0.88	27
47	Slovakia	0.09	4
48	Spain	2.14	231
49	Switzerland	-0.04	-4
50	Ukraine	0.73	26
	NORTH & CENTRAL AMERICA
51	Canada	1.45	122
52	Cuba	4.01	115
53	El Salvador	1.93	55
54	Guatemala	-0.7	-12
55	Haiti	-0.42	-3
56	Honduras	0.53	8
57	Mexico	2.15	68
58	Nicaragua	0.45	6
59	Panama	0.48	7
60	United States of America	1.65	163
	SOUTH AMERICA
61	Argentina	2.8	204
62	Bolivia (Plurinational State of)	1.78	41
63	Brazil	2.58	98
64	Chile	1.66	187
65	Colombia	2.88	80
66	Ecuador	2.96	57
67	Peru	1.82	51
68	Uruguay	4.01	206
69	Venezuela	2.09	77
	AFRICA
70	Angola	2.88	20
71	Benin	1.06	13
72	Burkina Faso	1.21	21
73	Burundi	-1.9	-19
74	Cameroon	1.36	31
75	Central African Republic	0.37	3
76	Chad	-0.94	-8
77	Dem. Rep. Congo	-0.29	-2
78	Egypt	1.93	167
79	Ethiopia	1.39	28
80	Ghana	0.76	12
81	Guinea	2.11	35
82	Ivory Coast	4.08	103
83	Kenya	-0.41	-7
84	Madagascar	2.26	32
85	Malawi	1.81	29
86	Mali	0.98	15
87	Morocco	-2.43	-13
88	Mozambique	3.17	34
89	Nigeria	1.43	24
90	Rwanda	-7.09	-43
91	Senegal	2.33	41
92	Somalia	-2.02	-15
93	South Africa	2.16	69
94	Tanzania	0.7	12
95	Togo	1.02	12
96	Uganda	0.75	12
97	Zambia	-0.22	-4
98	Zimbabwe	-7.56	-49

## Sheet: RICE
	RICE	current rates
		mean	mean
		%/year	kg/ha/year/year
	Region
	GLOBAL	0.95	40
	ASIA-AUSTRALASIA
1	Afghanistan	2.4	73
2	Australia	0.27	24
3	Bangladesh	2.16	86
4	Bhutan	2.4	62
5	Cambodia	2.59	65
6	China	0.71	46
7	Dem. People's Republic of Korea	-2	-70
8	India	1.01	32
9	Indonesia	0.44	20
10	Iran (Islamic Republic of)	0.92	42
11	Iraq	0.4	10
12	Japan	0.46	30
13	Kazakhstan	-1.94	-54
14	Lao People's Democratic Republic	2.1	76
15	Malaysia	1.14	40
16	Myanmar	1.44	55
17	Nepal	1.07	30
18	Pakistan	1.54	51
19	Philippines	1.42	52
20	Republic of Korea (South Korea)	0.26	17
21	Sri Lanka	1.14	43
22	Thailand	1.62	50
23	Turkey	1.77	121
24	Turkmenistan	-1.54	-26
25	Uzbekistan	-0.28	-7
26	Vietnam	2.17	112
	EUROPE
27	France	0.18	10
28	Greece	1.1	88
29	Italy	0.67	44
30	Portugal	1.19	75
31	Russian Federation	1.51	59
32	Spain	0.85	63
33	Ukraine	0.36	14
	NORTH & CENTRAL AMERICA
34	Costa Rica	-0.62	-23
35	Cuba	0.87	28
36	Dominican Republic	-0.15	-7
37	Haiti	-0.11	-2
38	Mexico	1.06	49
39	Nicaragua	0.94	34
40	Panama	0.16	3
41	United States of America	1.17	92
	SOUTH AMERICA
42	Argentina	1.95	128
43	Bolivia (Plurinational State of)	1.18	28
44	Brazil	2.7	108
45	Chile	1.18	61
46	Colombia	2.01	125
47	Ecuador	1.38	58
48	Guyana	1.44	65
49	Paraguay	1.65	64
50	Peru	1.6	116
51	Suriname	0.15	6
52	Uruguay	1.85	136
53	Venezuela	1.33	70
	AFRICA
54	Benin	2.87	78
55	Burkina Faso	-0.13	-3
56	Chad	-5.98	-57
57	Democratic Republic of Congo	-0.23	-2
58	Egypt	1.84	194
59	Ghana	1.3	28
60	Guinea	0.17	3
61	Guinea-Bissau	-2.82	-37
62	Ivory Coast	2.6	54
63	Liberia	0.47	6
64	Madagascar	1.15	29
65	Malawi	-0.16	-3
66	Mali	2.21	55
67	Mauritania	1.24	56
68	Mozambique	1.42	15
69	Nigeria	-3.23	-39
70	Senegal	0.73	19
71	Sierra Leone	-0.81	-9
72	Tanzania	0.75	14
73	Togo	2.59	64
74	Uganda	0.24	3

## Sheet: WHEAT
	WHEAT	current rates
		mean	mean
	Region	%/year	kg/ha/year/year
	GLOBAL	0.94	27
	ASIA-AUSTRALASIA
1	Afghanistan	1.91	29
2	Armenia	0	0
3	Australia	-0.7	-11
4	Azerbaijan	1.25	31
5	Bangladesh	0.53	11
6	Bhutan	2.11	32
7	China	1.68	76
8	Dem. People's Republic of Korea (N. Korea)	2.67	67
9	Georgia	-1.67	-25
10	India	1.13	32
11	Iran (Ismalic Republic of)	3.17	85
12	Iraq	2.26	27
13	Japan	0.97	39
14	Jordan	-1.01	-13
15	Kazakhstan	1.26	14
16	Kyrgyzstan	-1.05	-22
17	Lebanon	1.42	40
18	Mongolia	-3.48	-22
19	Myanmar	2	29
20	Nepal	2.28	50
21	New Zealand	1.39	120
22	Oman	2.13	73
23	Pakistan	1.73	46
24	Republic of Korea (South Korea)	0.22	7
25	Saudi Arabia	1.01	54
26	Syrian Arab Republic	1.96	55
27	Tajikistan	3.41	70
28	Thailand	1.99	18
29	Turkey	0.58	13
30	Turkmenistan	3.01	101
31	Uzbekistan	4.29	194
32	Yemen	-1.02	-14
	EUROPE
33	Albania	0.84	26
34	Austria	-0.09	-5
35	Belarus	0.9	25
36	Belgium	1.33	119
37	Bulgaria	-2.43	-61
38	Czech Republic	-0.18	-8
39	Denmark	0.07	5
40	Estonia	1.53	41
41	Finland	0.64	23
42	France	0.42	29
43	Germany	0.85	65
44	Greece	-1.02	-23
45	Hungary	-1.73	-61
46	Ireland	0.82	75
47	Italy	0.62	22
48	Latvia	1.4	44
49	Lithuania	0.97	33
50	Netherlands	0.33	27
51	Norway	0.43	20
52	Poland	0.29	11
53	Portugal	-0.27	-4
54	Republic of Moldova	-7.3	-113
55	Romania	-1.44	-33
56	Russian Federation	0.81	16
57	Slovakia	-2.51	-87
58	Spain	1.17	34
59	Sweden	0.37	23
60	Switzerland	-0.34	-20
61	Ukraine	-3.12	-68
62	United Kingdom	0.8	65
	NORTH & CENTRAL AMERICA
63	Canada	1.3	33
64	Guatemala	-0.25	-5
65	Honduras	-1.67	-8
66	Mexico	1.08	57
67	United States of America	0.82	24
	SOUTH AMERICA
68	Argentina	1.49	41
69	Bolivia (Plurinational State of)	1.66	18
70	Brazil	1.53	31
71	Chile	1.86	88
72	Colombia	0.08	2
73	Ecuador	0.15	1
74	Paraguay	1.06	22
75	Peru	0.5	7
76	Uruguay	1.41	38
	AFRICA
77	Algeria	2.65	38
78	Angola	2.68	49
79	Burundi	0.52	4
80	Cameroon	-1	-14
81	Chad	0.02	0
82	Democratic Republic of Congo	1.24	17
83	Egypt	1.53	106
84	Eritrea	3.41	30
85	Ethiopia	0.95	14
86	Kenya	1.93	48
87	Lesotho	-0.02	0
88	Libya	-2.69	-18
89	Madagascar	1.33	36
90	Malawi	3.21	38
91	Mali	2.39	69
92	Mauritania	2.98	60
93	Morocco	-0.49	-6
94	Mozambique	-4.18	-33
95	Namibia	0.92	50
96	Niger	-2.58	-38
97	Nigeria	2.44	81
98	Rwanda	-3.77	-26
99	Somalia	0.07	0
100	South Africa	2.66	76
101	Sudan	2.87	82
102	Tanzania	1.54	30
103	Tunisia	1.73	31
104	Uganda	-1.11	-18
105	Zambia	1.7	115
106	Zimbabwe	-3.9	-137

## Sheet: SOYBEAN
	SOYBEAN	current rates
		mean	mean
	Region	%/year	kg/ha/year/year
	GLOBAL	1.26	31
	ASIA-AUSTRALASIA
1	Australia	1.22	26
2	Cambodia	-2.09	-25
3	China	0.88	16
4	India	0.64	7
5	Indonesia	0.88	12
6	Iran	1.85	41
7	Japan	0.12	2
8	Kazakhstan	1.42	22
9	Laos	1.62	18
10	Myanmar	1.99	24
11	Nepal	2.18	21
12	North Korea	-1.16	-13
13	Thailand	0.78	12
14	Turkey	2.43	90
15	Vietnam	2.56	39
	EUROPE
16	Czech Republic	2.37	44
17	France	0.56	15
18	Hungary	0.99	22
19	Italy	-0.1	-3
20	Moldova	1.01	12
21	Romania	3.01	65
22	Russian Federation	0.22	2
23	Slovak Republic	0.51	8
24	Ukraine	2.08	29
	NORTH & CENTRAL AMERICA
25	Canada	0.23	6
26	Guatemala	0.4	12
27	Mexico	0.79	12
28	United States	1.23	35
	SOUTH AMERICA
29	Argentina	1.53	43
30	Bolivia	-0.35	-6
31	Brazil	1.7	47
32	Colombia	0.53	11
33	Ecuador	0.32	6
34	Paraguay	-0.1	-2
35	Uruguay	1.77	39
36	Venezuela	2.37	67
	AFRICA
37	Benin	1.15	9
38	Burkina Faso	1.8	24
39	Democratic Republic of Congo	-9.28	-32
40	Egypt	1.19	38
41	Nigeria	3.88	42
42	Rwanda	-2.93	-15
43	Uganda	1.1	13
44	Zambia	1.51	21
45	Zimbabwe	-1.22	-19
